# Supplementary material
Source: PubMed Central journal article supplement (PMC2775834)
Supplement: mmc1.pdf [file mmc1.pdf]

## ***CNTNAP2* and *NRXN1* Are Mutated in Autosomal-Recessive Pitt-Hopkins-like Mental Retardation and Determine the Level of a Common Synaptic Protein in *Drosophila***

Christiane Zweier, Eiko K. de Jong, Markus Zweier, Alfredo Orrico, Lilian B. Ousager, Amanda L. Collins, Emilia K. Bijlsma, Merel A.W. Oortveld, Arif B. Ekici, André Reis, Annette Schenck, and Anita Rauch

Figure S1. SNP Copy Number Profile in Family 1

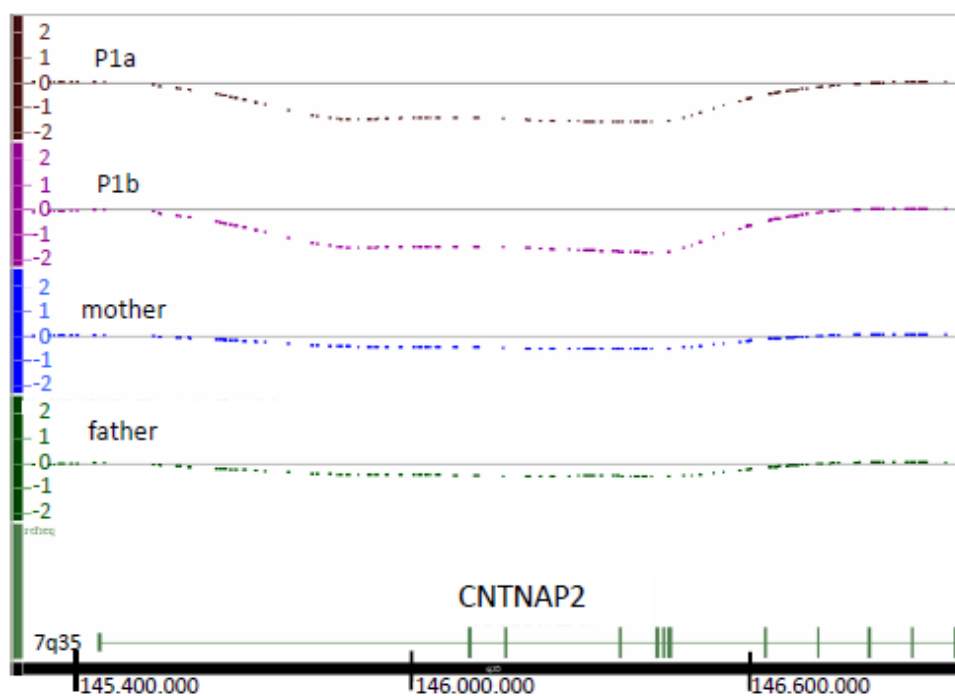

SNP copy number profile (Log2 ratio) of the Affymetrix 250 K array, analyzed with the Genotyping Console 3.0.2 software (Affymetrix) in all members of family 1, showing a homozygous deletion within the *CNTNAP2* gene in both affected children and a heterozygous deletion in both healthy parents.

**Figure S2. FISH Analysis in Family 1**

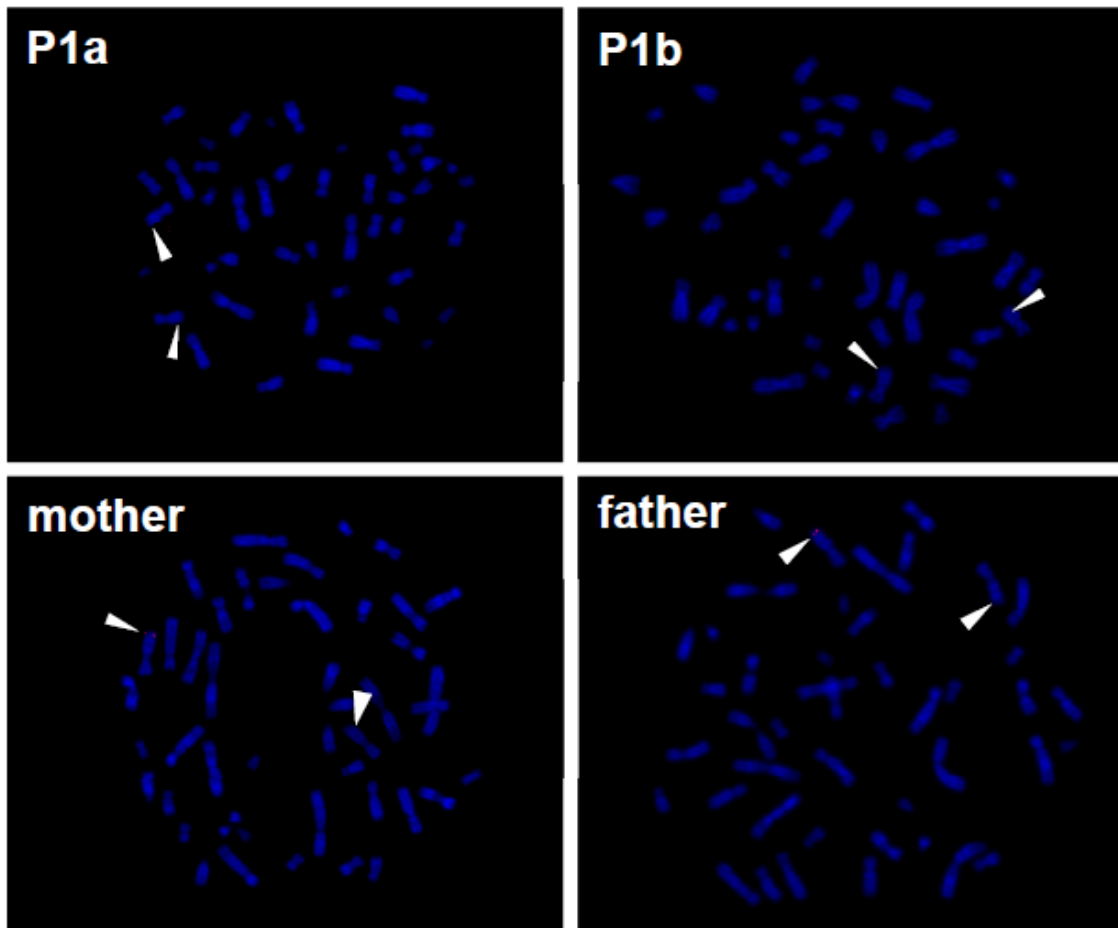

FISH analysis with the directly Cy3-labeled BAC clone RP4-558L10 on metaphase spreads. White arrowheads indicate chromosomes 7. In the patients (P1a, P1b) a homozygous deletion of the BAC clone can be seen, in both parents a heterozygous deletion each.

**Figure S3. Expression of Daughterless, Nr<sub>x</sub>-IV, and Nr<sub>x</sub>-I in Daughterless Knockdown Larvae**

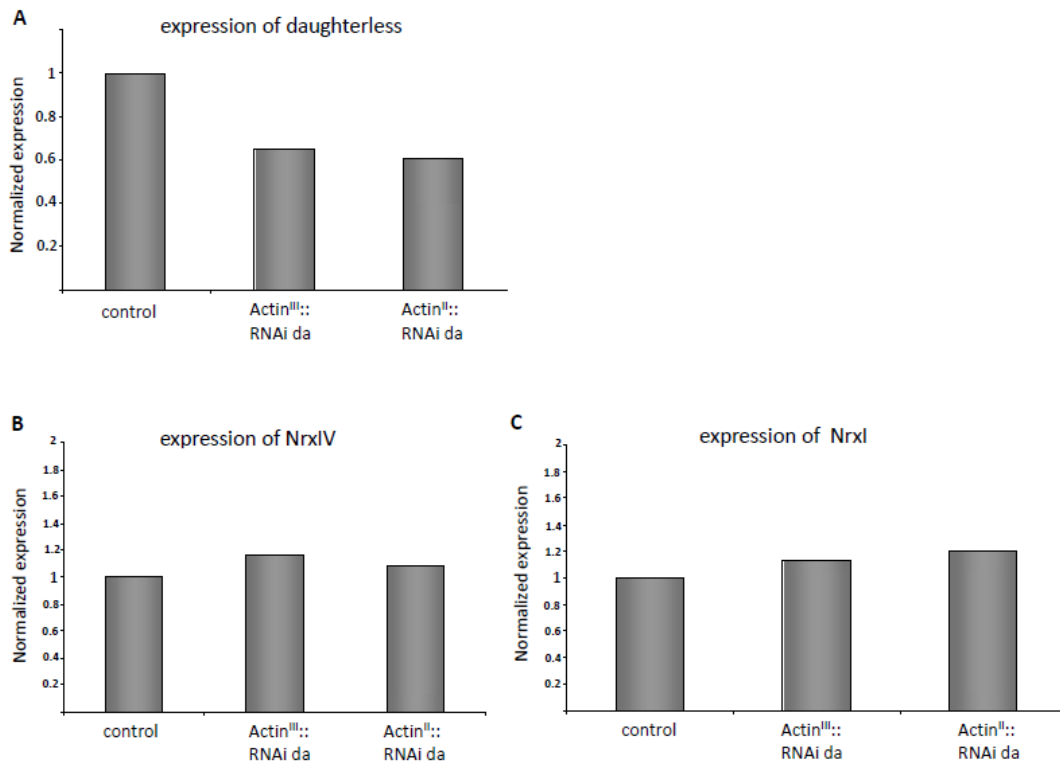

(A) Normalized expression of daughterless after a knockdown with two different ubiquitous drivers on the second (II, Actin-Gal4 17bFO1) and third (III, Actin-Gal4 25FO1) chromosome, respectively. In both cases the knockdown is down to 60% compared to the wt (w1118) (B,C) Normalized expression of Nr<sub>x</sub>-IV and Nr<sub>x</sub>-I upon knockdown of daughterless, respectively. No significant changes were detected.

**Figure S4. Immunostaining of the Embryonic Nervous System**

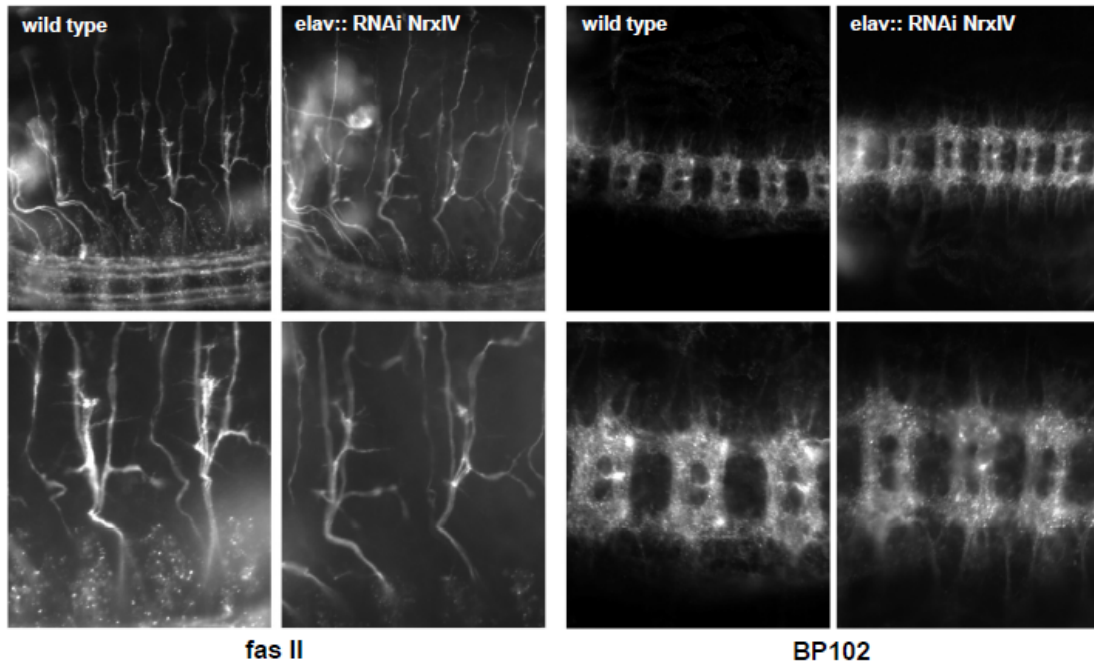

Examples of immunofluorescence analysis of the nervous system in wild type and *Nrx-IV* panneuronal knockdown embryos. Anti-*fas II* stains motor- and central pioneer axons. Antibody BP102 stains axon tracts/the central neuropile region. No apparent morphological or structural alterations were observed in the *Nrx-IV* knockdown embryos compared to the wild type.

**Table S1. Primer Sequences for Amplification and Sequencing of All Coding Exons of *CNTNAP2* and *NRXN1***

| exon         | primer sequence            | amplicon length (bp) |
|--------------|----------------------------|----------------------|
| CNTNAP2_e1F  | CCTCGCGTATTTGAGGACAG       | 345                  |
| CNTNAP2_e1R  | AGTGGCTGCAAGTGTGTGAC       |                      |
| CNTNAP2_e2F  | GAATTGCCTAAATTCCTTTC       | 363                  |
| CNTNAP2_e2R  | TGGTGTCTGCCAACATCTG        |                      |
| CNTNAP2_e3F  | GCACTGCCAAGACCAATTAAG      | 427                  |
| CNTNAP2_e3R  | TGATGAATAAATAGTTTCCCAATG   |                      |
| CNTNAP2_e4F  | catggatgaaaagaccaca        | 481                  |
| CNTNAP2_e4R  | aaggtagtttattgtcagagaaagca |                      |
| CNTNAP2_e5F  | tcttgcagacacctgttg         | 452                  |
| CNTNAP2_e5R  | ttttgaatgactagggtttcatt    |                      |
| CNTNAP2_e6F  | tcccaggtaactcgaatgg        | 477                  |
| CNTNAP2_e6R  | tgaaacgaattaatcaggtttt     |                      |
| CNTNAP2_e7F  | GCCATAGATTTTGGAGGCAG       | 413                  |
| CNTNAP2_e7R  | ACATCATTTTGCCTAAACAC       |                      |
| CNTNAP2_e8F  | TCACTGAATCCATGCTCTGC       | 524                  |
| CNTNAP2_e8R  | AAAACCTAATCCTGAGCGTGTAAC   |                      |
| CNTNAP2_e9F  | ttgtaagcagcactgtatttcc     | 497                  |
| CNTNAP2_e9R  | ggccagaagaatatggtgaca      |                      |
| CNTNAP2_e10F | GAAACAGTAGTTGGATGTGATGG    | 408                  |
| CNTNAP2_e10R | GAATGGTAATTTCCACCTTACCTG   |                      |
| CNTNAP2_e11F | CCTTGGTAAGGCAACCTGG        | 365                  |
| CNTNAP2_e11R | GAAATGACAATTGGAATCTTGG     |                      |
| CNTNAP2_e12F | CTCTTTCCAGGAAGAATACTCC     | 369                  |
| CNTNAP2_e12R | GCAATATGTTGCTGATTAGATGTTG  |                      |
| CNTNAP2_e13F | GCTCTCCTTAACACTGTTCTACACC  | 460                  |
| CNTNAP2_e13R | CCTATTTACAGCTTCCTTCTACTG   |                      |
| CNTNAP2_e14F | agagtattcctgggaagtgg       | 440                  |
| CNTNAP2_e14R | ttgtcgactgacctttct         |                      |
| CNTNAP2_e15F | CCAAACGATTACTGAAATGTCATC   | 373                  |
| CNTNAP2_e15R | ATCTCTGCTTGGGTTGTGTG       |                      |
| CNTNAP2_e16F | tgtgaggatttggccaatg        | 469                  |
| CNTNAP2_e16R | aggcttgtgtgtccacctct       |                      |
| CNTNAP2_e17F | TCGACCTTTGTAGGACGTGAC      | 479                  |
| CNTNAP2_e17R | GGCCAACACCTTTACTTTTGG      |                      |
| CNTNAP2_e18F | GCCTTATAGCCTGCAGGGAG       | 587                  |
| CNTNAP2_e18R | GATTAGGAAATGATTTTGGTTGG    |                      |
| CNTNAP2_e19F | TACTCAGATGCCCTTCTCTGG      | 462                  |
| CNTNAP2_e19R | GCCTATGGGGAATAAATAACAAAC   |                      |
| CNTNAP2_e20F | agcaggaattgaggggatgt       | 350                  |
| CNTNAP2_e20R | ttatgcactgtaggagaaagtgt    |                      |
| CNTNAP2_e21F | GAAAACCAGGGTTCAAAGAGTG     | 314                  |
| CNTNAP2_e21R | AAGATATTCGTGACTGGCCC       |                      |
| CNTNAP2_e22F | gctttggacacaagcattca       | 462                  |
| CNTNAP2_e22R | acgttcctttgccctttct        |                      |
| CNTNAP2_e23F | gttgtgattctgtgggagaca      | 366                  |
| CNTNAP2_e23R | cagcaaaatgaataatgtaaaacc   |                      |
| CNTNAP2_e24F | GAGAGGGCTGTGTCTGACG        | 437                  |
| CNTNAP2_e24R | ATATTCCATTGCCTGCCTCC       |                      |
|              |                            |                      |
| NRXN1_ex2aF  | CCCTTACCTTTCTGTCTCTCG      | 499                  |
| NRXN1_ex2aR  | GTCGATGAAGAGCGTGGTGT       |                      |

|             |                             |     |
|-------------|-----------------------------|-----|
| NRXN1_ex2bF | CGACTTCCTGGAGCTGATTC        | 696 |
| NRXN1_ex2bR | gagtccccagaaacaaggt         |     |
| NRXN1_ex3F  | tgattttgtttccccttg          | 344 |
| NRXN1_ex3R  | gatggcagggtgagaatgt         |     |
| NRXN1_ex4F  | gtgcagcatatgccagtgtt        | 446 |
| NRXN1_ex4R  | agccacaggaacaaaccaa         |     |
| NRXN1_ex5F  | aagccaggctgtctctgcta        | 386 |
| NRXN1_ex5R  | tctggattggtctcgaggtt        |     |
| NRXN1_ex6F  | ctgtttgactgagacagagtca      | 596 |
| NRXN1_ex6R  | tggcaggaagattcatctcag       |     |
| NRXN1_ex7F  | ctctgtggaggcctacttg         | 418 |
| NRXN1_ex7R  | cagatgaaaagaaggaggtcaaa     |     |
| NRXN1_ex8F  | caggcatatcccaggattaca       | 341 |
| NRXN1_ex8R  | gtgccgtttgactctggaac        |     |
| NRXN1_ex9F  | tcggtgaaagttacatgagctg      | 595 |
| NRXN1_ex9R  | tcacttttaggaatggcatgg       |     |
| NRXN1_ex10F | ttgtctgcctccaaggagtt        | 573 |
| NRXN1_ex10R | caatggtcagtgccaggtttg       |     |
| NRXN1_ex11F | tgaagaagatgaattgattttgtagt  | 493 |
| NRXN1_ex11R | ccccgaaaacctcaaatta         |     |
| NRXN1_ex12F | ttggccattttaaaaccttc        | 432 |
| NRXN1_ex12R | gcagtgggaaagtcttcagc        |     |
| NRXN1_ex13F | ctctgtgaggttcatttgcttg      | 380 |
| NRXN1_ex13R | tgtcattttgaggaaaaacacc      |     |
| NRXN1_ex14F | tgtgatattgttatgaaagcctaaa   | 599 |
| NRXN1_ex14R | tgccctctatttgcctcca         |     |
| NRXN1_ex15F | ggatggaaccacctgaaaaa        | 450 |
| NRXN1_ex15R | cagaggctgtgtgtgtattg        |     |
| NRXN1_ex16F | tttagcactttggggaaaaca       | 433 |
| NRXN1_ex16R | ccaaattgggtatttgaccag       |     |
| NRXN1_ex17F | cagcctctcagttcctaattca      | 429 |
| NRXN1_ex17R | cctttccgtagaacaactgc        |     |
| NRXN1_ex18F | gccatagttttgtgtgtagagttga   | 416 |
| NRXN1_ex18R | tttcctatacaaaagtactggtttctg |     |
| NRXN1_ex19F | gaagtaaaattggaggaaagca      | 450 |
| NRXN1_ex19R | ggacagcattacattcacatgac     |     |
| NRXN1_ex20F | tgctctcattattcacccata       | 541 |
| NRXN1_ex20R | ggaagctgtagtcctaagatca      |     |
| NRXN1_ex21F | aaagggaaatagtgaatttggttc    | 449 |
| NRXN1_ex21R | aagccctgtgtgctataccc        |     |
| NRXN1_ex22F | aggcaaagggtggctacat         | 550 |
| NRXN1_ex22R | TGTGCTTCATAAAAAGGAAAGTAAA   |     |

**Table S2. Probe Sequences for MLPA Analysis of All Coding Exons of *CNTNAP2* and Exon 2 of *NRXN1***

| exon           | probe sequence                                                       | probe length |
|----------------|----------------------------------------------------------------------|--------------|
| CNTNAP2_ex1_F  | GGGTTCCCTAAGGGTTGGATGCTGTGGATTGTCAGCAGCT<br>GCCTCT                   | 96           |
| CNTNAP2_ex1_R  | GCAGAGCCTGGACGGCTCCCTCCACGTTCTAGATTGGATC<br>TTGCTGGCAC               |              |
| CNTNAP2_ex2_F  | GGGTTCCCTAAGGGTTGGAGTGATGAGCCACTTGTCTCTG<br>GACTCCCCCA               | 104          |
| CNTNAP2_ex2_R  | TGTGGCTTTCAGCAGCTCCTCCTCCATCTCTTCTAGATTGG<br>ATCTTGCTGGCAC           |              |
| CNTNAP2_ex3_F  | GGGTTCCCTAAGGGTTGGAGTCTCCATCAGACAGCGACCA<br>TTATCAATGGCT             | 108          |
| CNTNAP2_ex3_R  | TCAGGTTGACTTTGGCAATCGGAAGCAGATCAGTCTAGATT<br>GGATCTTGCTGGCAC         |              |
| CNTNAP2_ex4_F  | GGGTTCCCTAAGGGTTGGAGAAACATTAACTCTGACGGTGT<br>GGTCCGGCACGAA           | 112          |
| CNTNAP2_ex4_R  | TTACAGCATCCGATTATTGCCCGCTATGTGCGCATTCTAGA<br>TTGGATCTTGCTGGCAC       |              |
| CNTNAP2_ex5_F  | GGGTTCCCTAAGGGTTGGAGATGGCCATGTTGTATTACCAT<br>ATAGATTCAGAAACAA        | 116          |
| CNTNAP2_ex5_R  | GAAGATGAAAACACTGAAAGATGTCATTGCCTTGAATCTAG<br>ATTGGATCTTGCTGGCAC      |              |
| CNTNAP2_ex6_F  | GGGTTCCCTAAGGGTTGGAGCATTAACTCACTCTGGACAG<br>GAGCATGCAGCACTTCC        | 120          |
| CNTNAP2_ex6_R  | GTACCAATGGAGAGTTTGACTACCTGGACTTGGACTATGTC<br>TAGATTGGATCTTGCTGGCAC   |              |
| CNTNAP2_ex7_F  | GGGTTCCCTAAGGGTTGGAGAGGCATCCCTTTCTCTGGCA<br>AGCCCAGCTC               | 104          |
| CNTNAP2_ex7_R  | CAGCAGTAGAAAGAATTTCAAAGGCTGCATGTCTAGATTGG<br>ATCTTGCTGGCAC           |              |
| CNTNAP2_ex8_F  | GGGTTCCCTAAGGGTTGGAGGACGGCTTAACCAGGACCTG<br>TTCTCAGTCAGTTCCAGTT      | 124          |
| CNTNAP2_ex8_R  | TAGGACATGGAACCCCAATGGTCTCCTGGTCTTCAGTCACT<br>TCTAGATTGGATCTTGCTGGCAC |              |
| CNTNAP2_ex9_F  | GGGTTCCCTAAGGGTTGGAGAATGATGGACAGTGGCACGA<br>GGTTGCTTCTCT             | 108          |
| CNTNAP2_ex9_R  | AGCCAAGGAAAATTTTGTATTCTCACCATCGATCTAGATTG<br>GATCTTGCTGGCAC          |              |
| CNTNAP2_ex10_F | GGGTTCCCTAAGGGTTGGACATTCCAAGGATGCATGCAGC<br>TCATTCAAGTGA             | 112          |
| CNTNAP2_ex10_R | CGATCAACTTGTAATTTATACGAAGTGGCACAAAGTCTAGA<br>TTGGATCTTGCTGGCAC       |              |
| CNTNAP2_ex11_F | GGGTTCCCTAAGGGTTGGAGACAGCTTCAAATGCACTTGTG<br>ATGAGAC                 | 100          |
| CNTNAP2_ex11_R | AGGATACAGTGGGGCCACCTGCCACAACCTTCTAGATTGGAT<br>CTTGCTGGCAC            |              |
| CNTNAP2_ex12_F | GGGTTCCCTAAGGGTTGGATATCTACGAGCCTTCTGTGAA<br>GCCTACAAA                | 104          |
| CNTNAP2_ex12_R | CACCTAGGACAGACATCAAATTATTACTGGATCTAGATTGG<br>ATCTTGCTGGCAC           |              |
| CNTNAP2_ex13_F | GGGTTCCCTAAGGGTTGGAGCAGATGCAGACGCCTGTGGT<br>CGGCTACAACCCAGAA         | 116          |
| CNTNAP2_ex13_R | AAATACTCAGTGACACAGCTCGTTTACAGCGCCTCCATCTA                            |              |

|                |                                                                      |     |
|----------------|----------------------------------------------------------------------|-----|
|                | GATTGGATCTTGCTGGCAC                                                  |     |
| CNTNAP2_ex14_F | GGGTTCCCTAAGGGTTGGAGCCCTTACACTTGGTGGGTTG<br>GCAAAGCCAACG             | 108 |
| CNTNAP2_ex14_R | AGAAGCACTACTACTGGGAGGCTCTGGGCCTGTCTAGAT<br>TGGATCTTGCTGGCAC          |     |
| CNTNAP2_ex15_F | GGGTTCCCTAAGGGTTGGATTGGAGATACTGACCGTCAAG<br>GCTCAG                   | 96  |
| CNTNAP2_ex15_R | AAGCCAAATTGAGCGTAGGTCTCTGCTCTAGATTGGATCT<br>TGCTGGCAC                |     |
| CNTNAP2_ex16_F | GGGTTCCCTAAGGGTTGGAGAACTAGCGCTGACATTTCTT<br>TCTACTTCAAAAC            | 112 |
| CNTNAP2_ex16_R | ATTAACCCCTGGGGAGTGTTCCTTGAAAATATGGTCTAGA<br>TTGGATCTTGCTGGCAC        |     |
| CNTNAP2_ex17_F | GGGTTCCCTAAGGGTTGGAGTGTCTTTTCATTTGATGTGG<br>GAAATGGGCCAGTAGAG        | 120 |
| CNTNAP2_ex17_R | ATTGTAGTGAGGTCACCAACCCTCTCAACGATGACCAGTC<br>TAGATTGGATCTTGCTGGCAC    |     |
| CNTNAP2_ex18_F | GGGTTCCCTAAGGGTTGGACAAAGGTCACATCTGGGTTCT<br>ATCCGGATGCTCGGGCCAT      | 124 |
| CNTNAP2_ex18_R | TGCACCAGCTATGGAACAAACTGTGAAAATGGAGGCAAATG<br>TCTAGATTGGATCTTGCTGGCAC |     |
| CNTNAP2_ex19_F | GGGTTCCCTAAGGGTTGGACCTGGCACAGGAGGAGATCCG<br>CTTCAGCTTCAGCACCACCA     | 124 |
| CNTNAP2_ex19_R | AGGCGCCCTGCATTCTCCTCTACATCAGCTCCTCACCACA<br>TCTAGATTGGATCTTGCTGGCAC  |     |
| CNTNAP2_ex20_F | GGGTTCCCTAAGGGTTGGATGGGTGGCACCCGAGAGCCAT<br>ACAATATT                 | 100 |
| CNTNAP2_ex20_R | GACGTAGACCACAGGAACATGGCCAATGGTCTAGATTGGAT<br>CTTGCTGGCAC             |     |
| CNTNAP2_ex21_F | GGGTTCCCTAAGGGTTGGATCCTTCTGTGAGTTACCATCTG<br>CCAAGTT                 | 100 |
| CNTNAP2_ex21_R | CATCCGACACCCTCTTCAATTCTCCCAAGTCTAGATTGGAT<br>CTTGCTGGCAC             |     |
| CNTNAP2_ex22_F | GGGTTCCCTAAGGGTTGGACAGGATCACTGGTTGCCTCTC<br>CAGAGTCCAGTTCAACC        | 120 |
| CNTNAP2_ex22_R | AGATCGCCCTCTCAAGGCCGCTTGAGGCAGACAAACGT<br>CTAGATTGGATCTTGCTGGCAC     |     |
| CNTNAP2_ex23_F | GGGTTCCCTAAGGGTTGGAGACAAGGCCAAGCTATAAGAA<br>ATGGAG                   | 96  |
| CNTNAP2_ex23_R | TCAACAGAAACTCGGCTATCATTGGAGTCTAGATTGGATCT<br>TGCTGGCAC               |     |
| CNTNAP2_ex24_F | GGGTTCCCTAAGGGTTGGACTGTGGTGATTTTACCATCCT<br>GTGCACCCTGGTCTT          | 116 |
| CNTNAP2_ex24_R | CCTGATCCGGTACATGTTCCGCCACAAGGGCACCTACTCTA<br>GATTGGATCTTGCTGGCAC     |     |
|                |                                                                      |     |
| NRXN1_ex2_F    | GGGTTCCCTAAGGGTTGGACGTGAGGGTCAACTCCTCGCA<br>GG                       | 88  |
| NRXN1_ex2_R    | TCCTGCCCGTGGACAGCGGCGAGTCTAGATTGGATCTTGC<br>TGGCAC                   |     |



**Table S3. Primer Sequences for Quantitative Real-Time PCR**

| <b>gene</b>    | <b>primer sequence</b> | <b>product length (bp)</b> |
|----------------|------------------------|----------------------------|
| Daughterless_F | CTCGCTGCAACAAAAGGAAT   | 120                        |
| Daughterless_R | AAGCAGTTCTGGAACACCTCA  |                            |
| Neurexin-I_F   | AATCTGCGGCTGCAAGTC     | 105                        |
| Neurexin-I_R   | GAAGAGACCACCCAGGTGAA   |                            |
| Neurexin-IV_F  | TGCCATACATCAAACAATCCA  | 111                        |
| Neurexin-IV_F  | AGGTTCTAGGGGACCACTGC   |                            |
